# Supplementary material for: Update of thermotolerant genes essential for survival at a critical high temperature in Escherichia coli
Source: PubMed Central journal article supplement (PMC5828445; doi:10.1371/journal.pone.0189487), 2018-02-27
Supplement: pone.0189487.s001.pdf [file pone.0189487.s001.pdf]

(A)

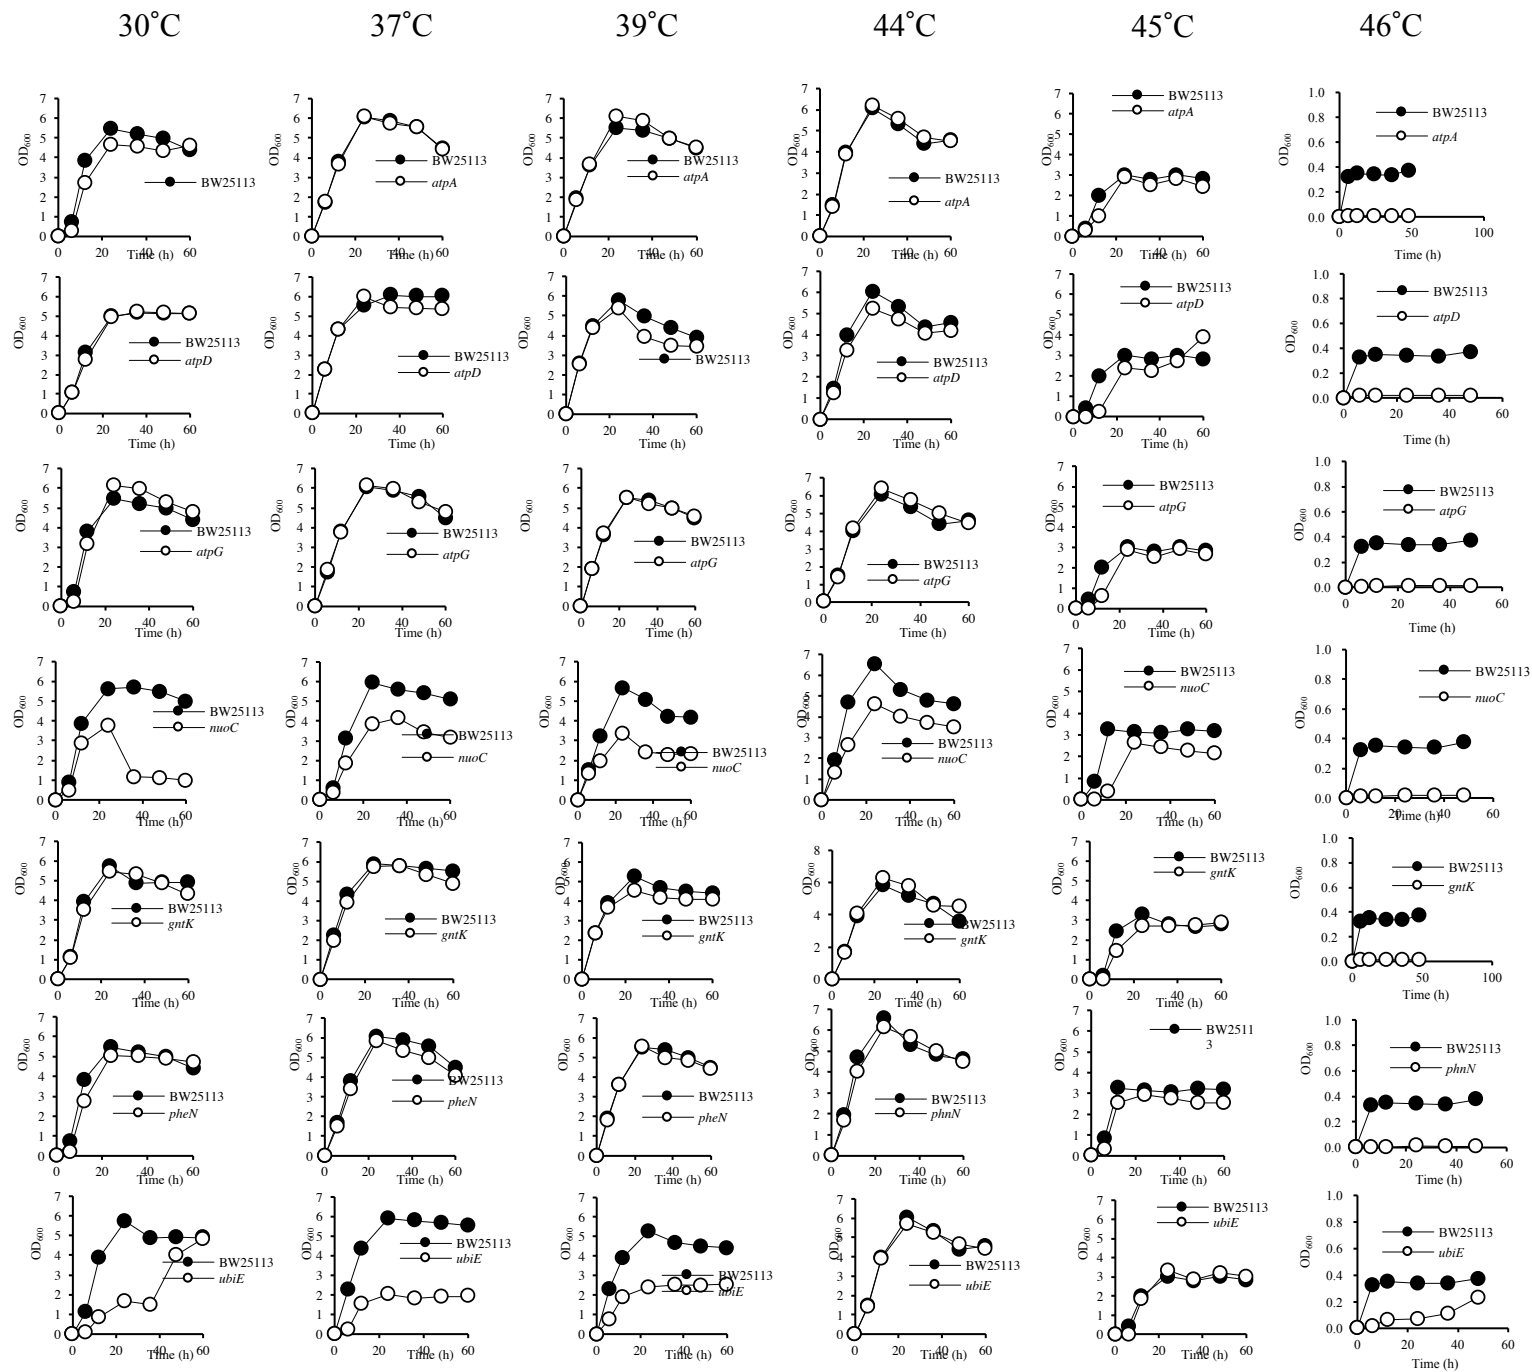

30°C

37°C

39°C

44°C

45°C

46°C

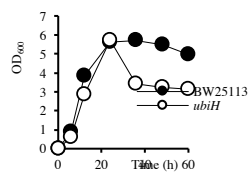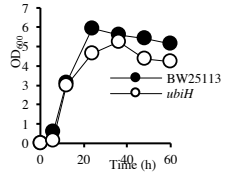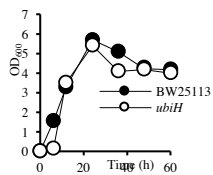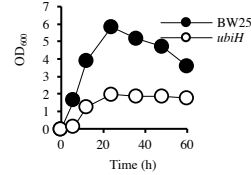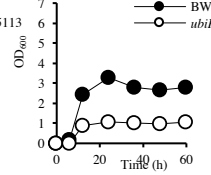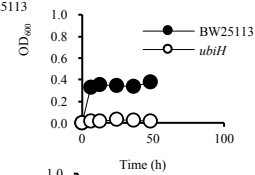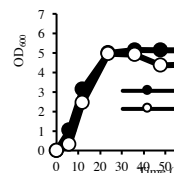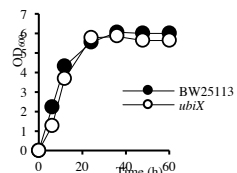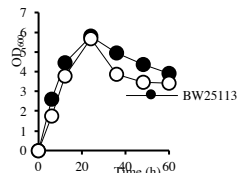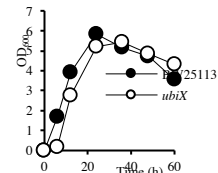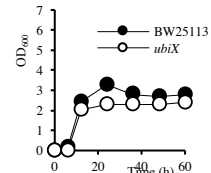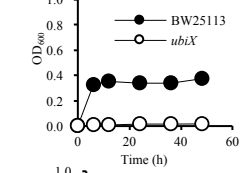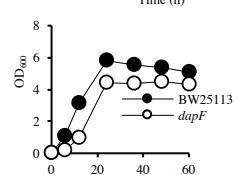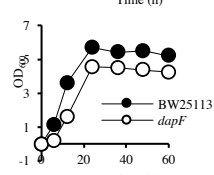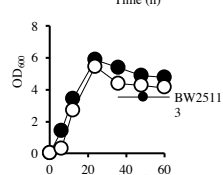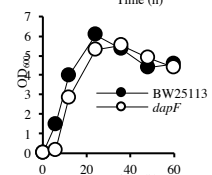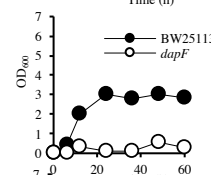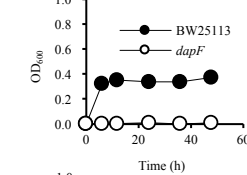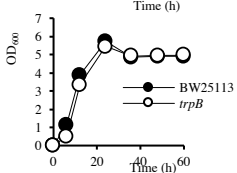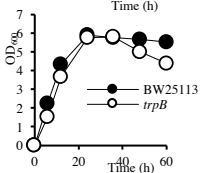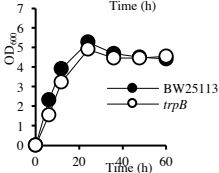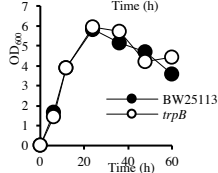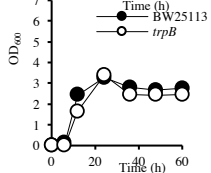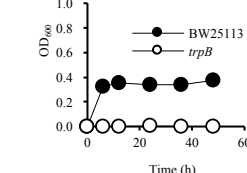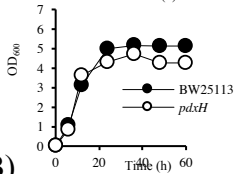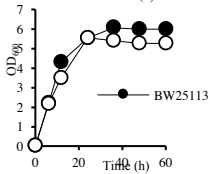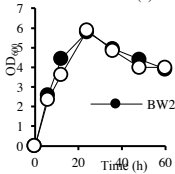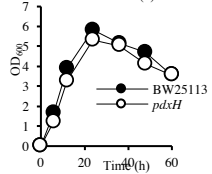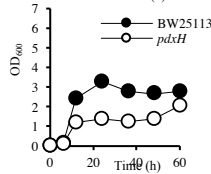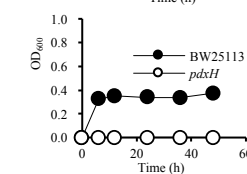

(B)

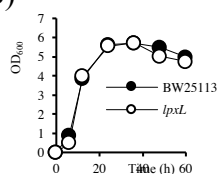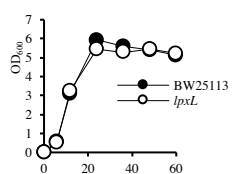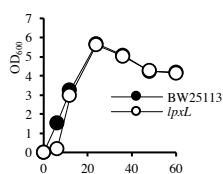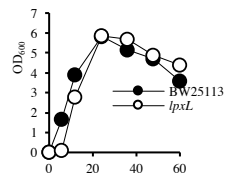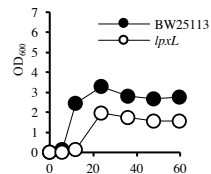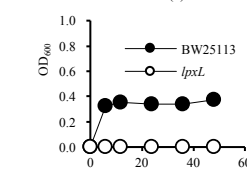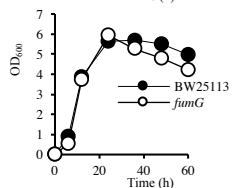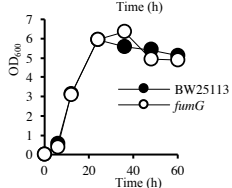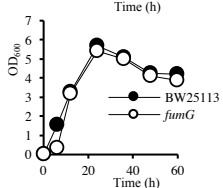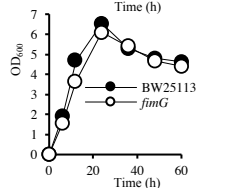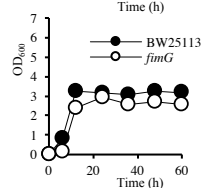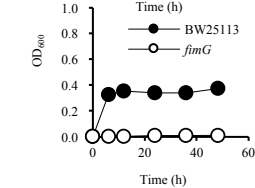

30°C

37°C

39°C

44°C

45°C

46°C

(C)

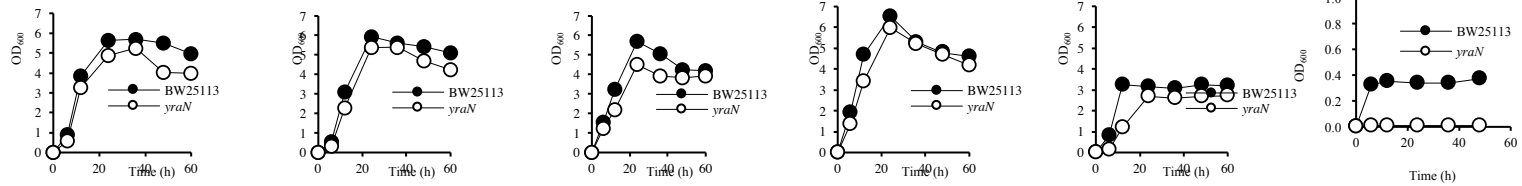

(D)

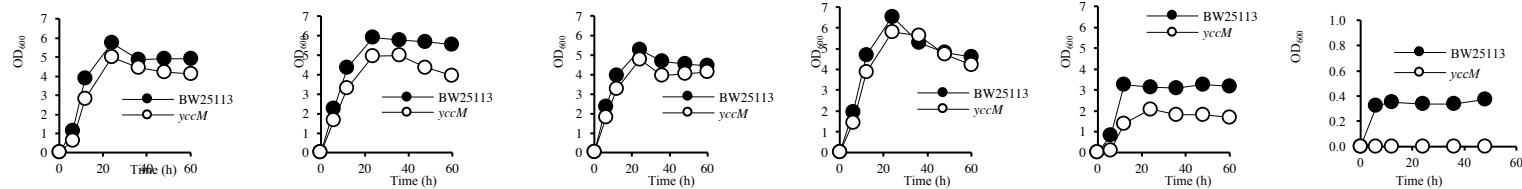

(E)

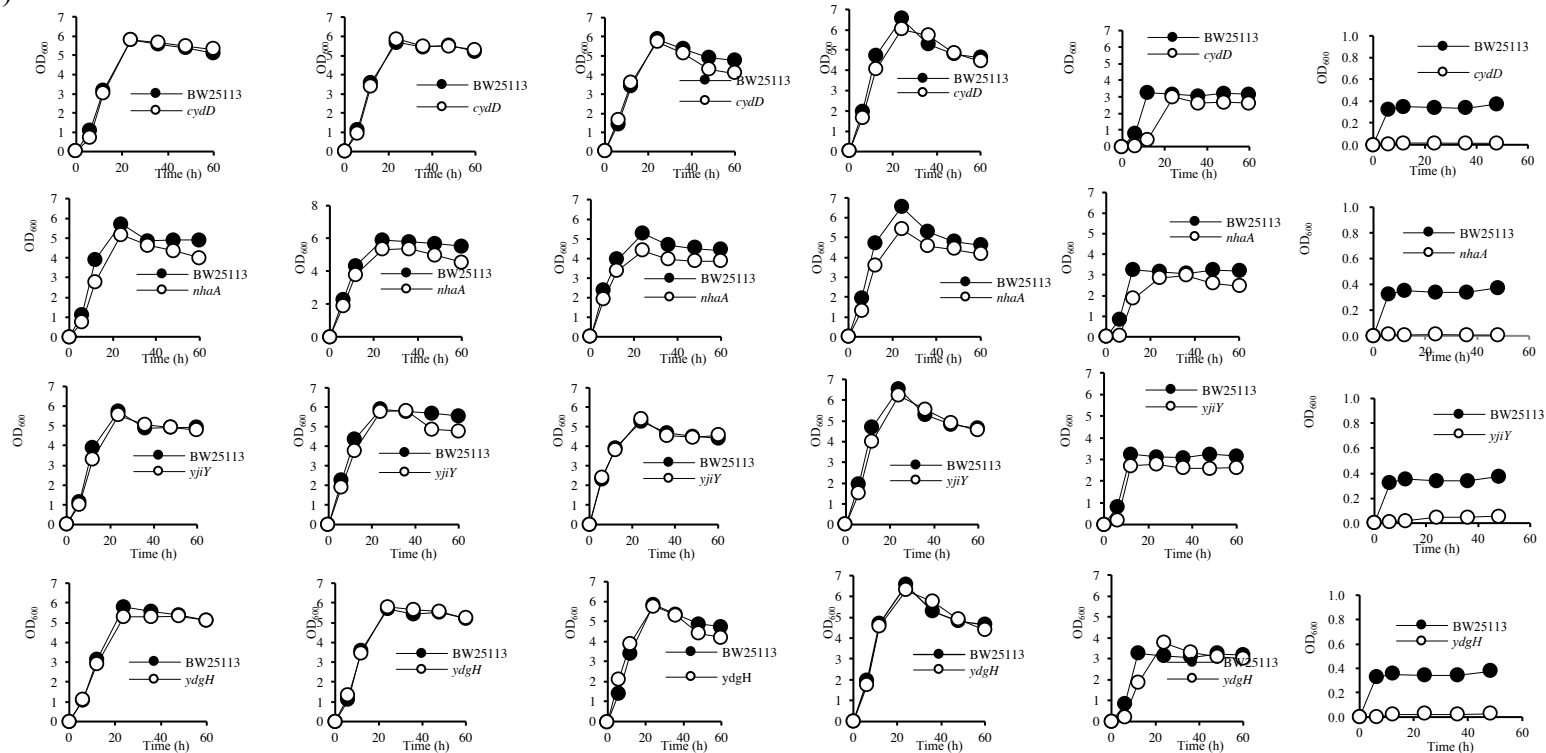

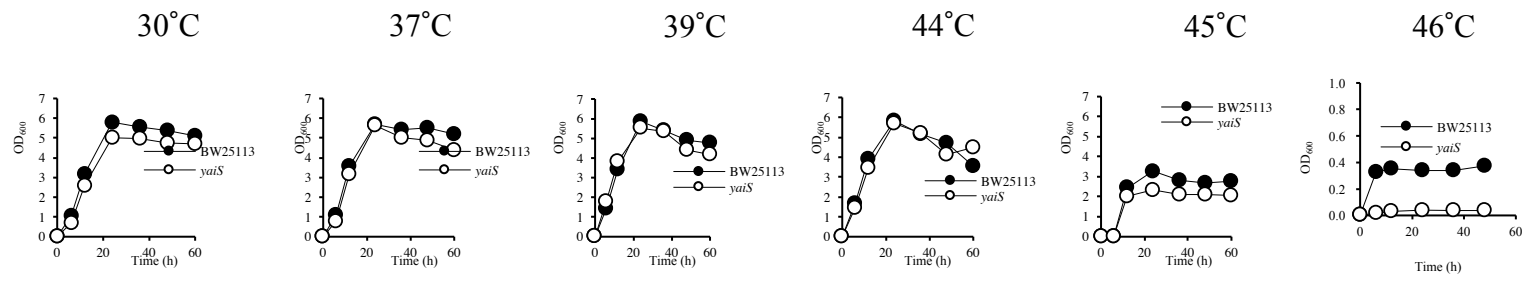

S1 Fig. Murata *et al*
