# Supplementary material for: Update of thermotolerant genes essential for survival at a critical high temperature in Escherichia coli
Source: PubMed Central journal article supplement (PMC5828445; doi:10.1371/journal.pone.0189487), 2018-02-27
Supplement: pone.0189487.s002.pdf [file pone.0189487.s002.pdf]

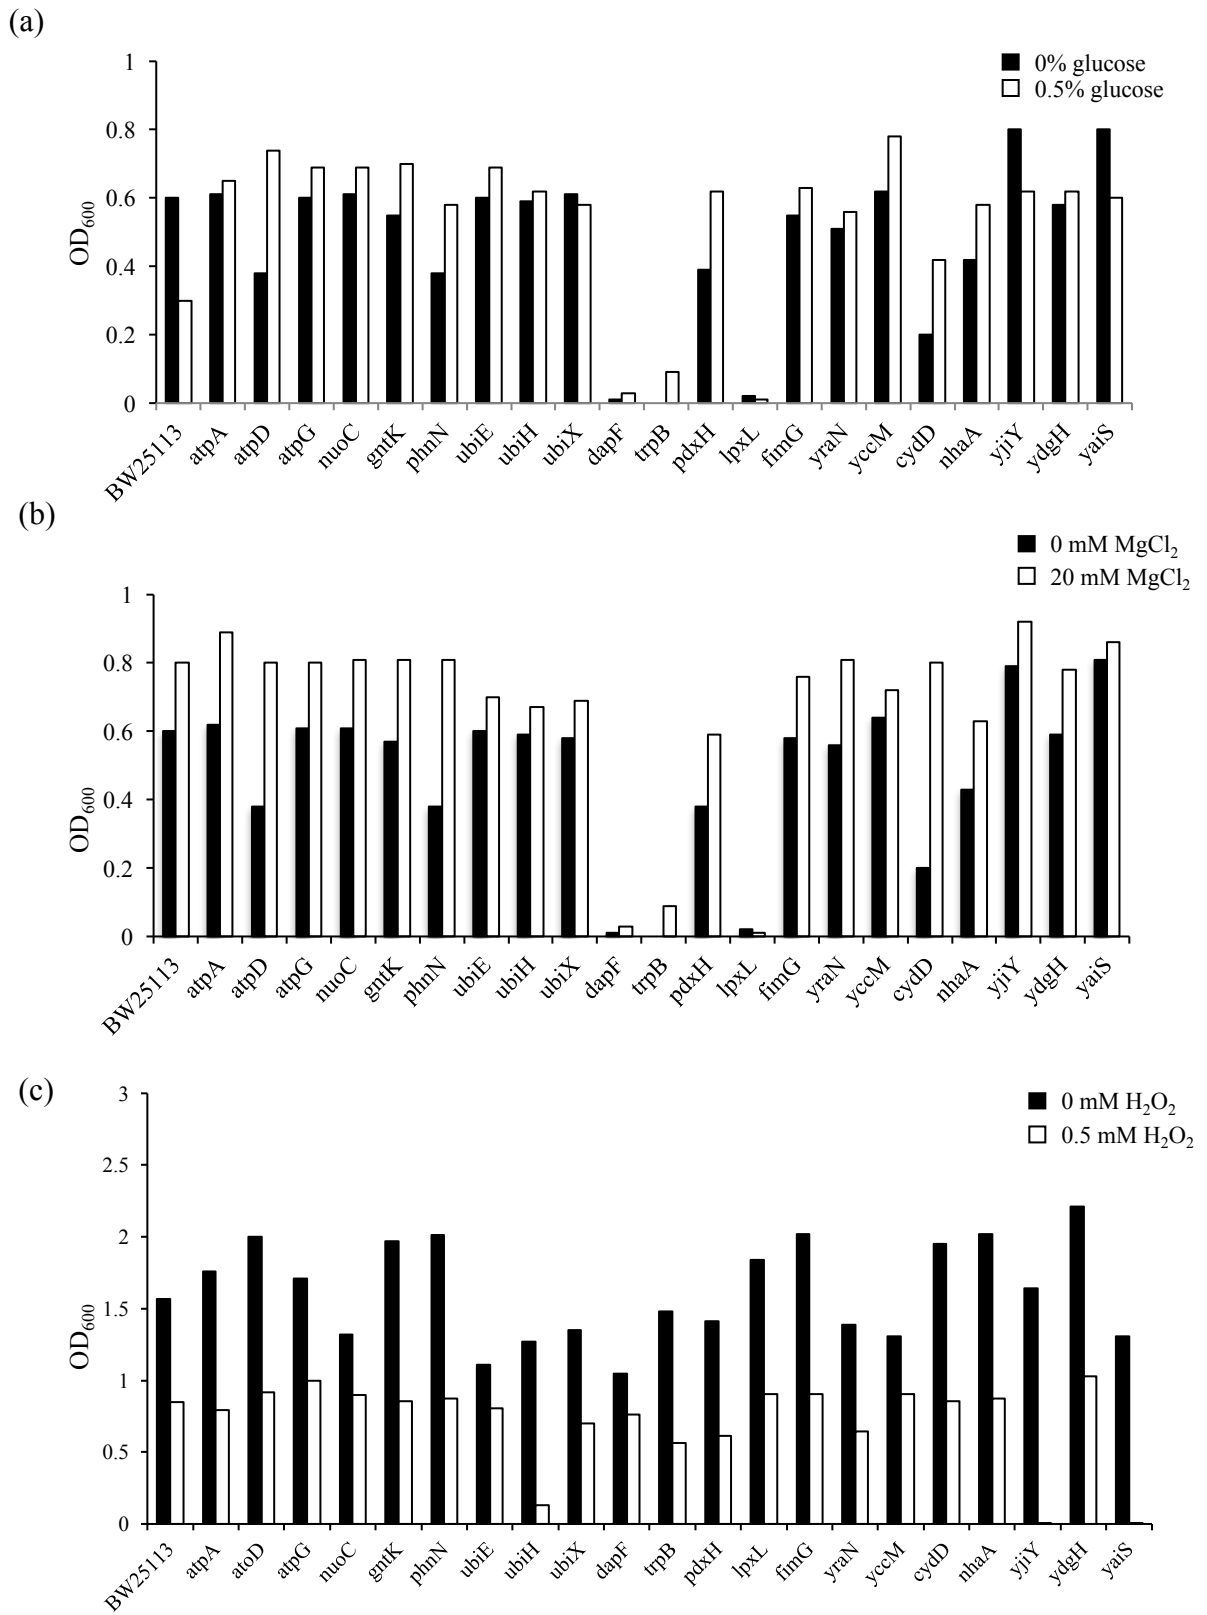

S2 Fig. Murata *et al*
