# Supplementary material for: Update of thermotolerant genes essential for survival at a critical high temperature in Escherichia coli
Source: PubMed Central journal article supplement (PMC5828445; doi:10.1371/journal.pone.0189487), 2018-02-27
Supplement: pone.0189487.s005.pdf [file pone.0189487.s005.pdf]

(A)

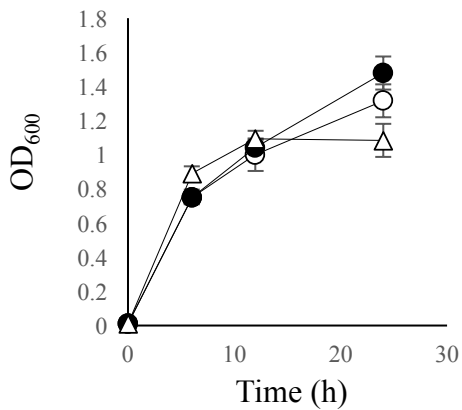

—○— BW25113*atpA::kan* (pUC-*atpA*)  
—●— BW25113*atpA::kan* (pUC19)  
—△— BW25113 (pUC19)

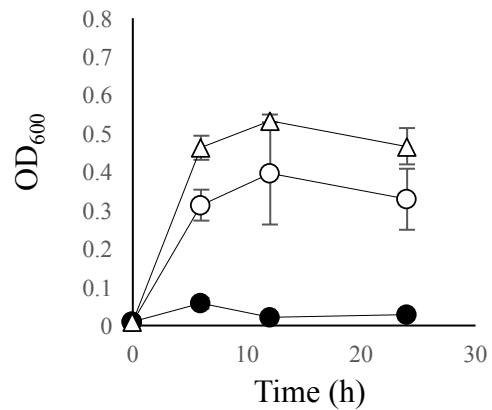

—○— BW25113*atpA::kan* (pUC-*atpA*)  
—●— BW25113*atpA::kan* (pUC19)  
—△— BW25113 (pUC19)

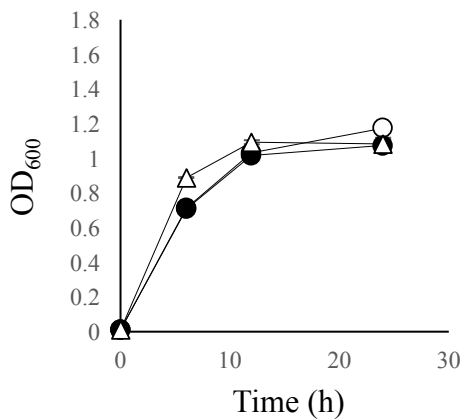

—○— BW25113*gntK::kan* (pUC-*gntK*)  
—●— BW25113*gntK::kan* (pUC19)  
—△— BW25113 (pUC19)

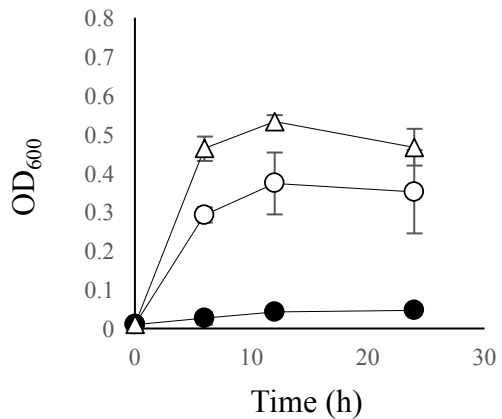

—○— BW25113*gntK::kan* (pUC-*gntK*)  
—●— BW25113*gntK::kan* (pUC19)  
—△— BW25113 (pUC19)

(B)

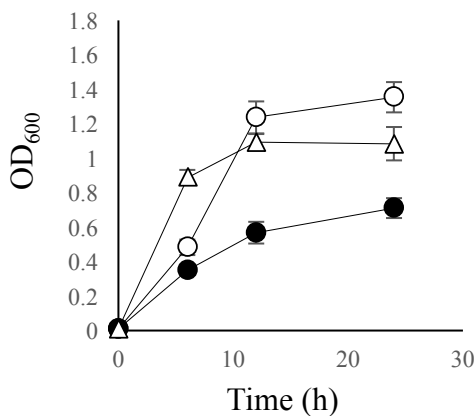

—○— BW25113*lpxL::kan* (pUC-*lpxL*)  
—●— BW25113*lpxL::kan* (pUC19)  
—△— BW25113 (pUC19)

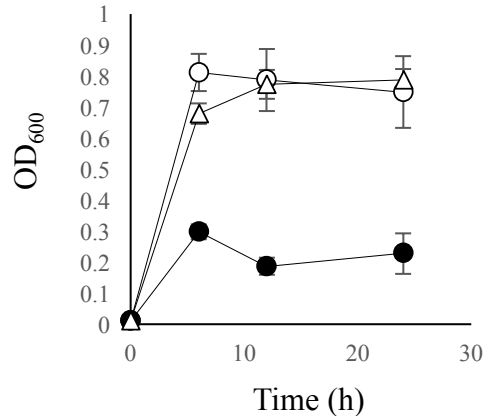

—○— BW25113*lpxL::kan* (pUC-*lpxL*)  
—●— BW25113*lpxL::kan* (pUC19)  
—△— BW25113 (pUC19)

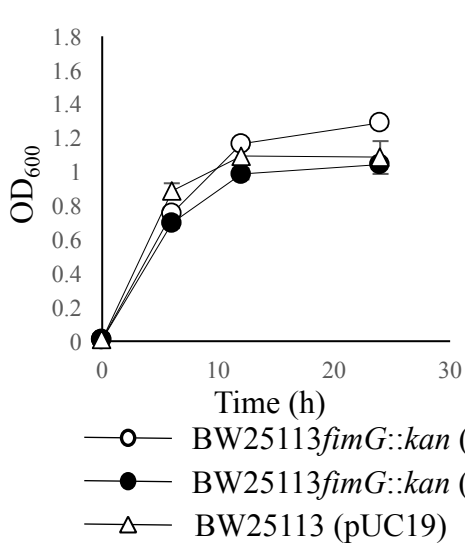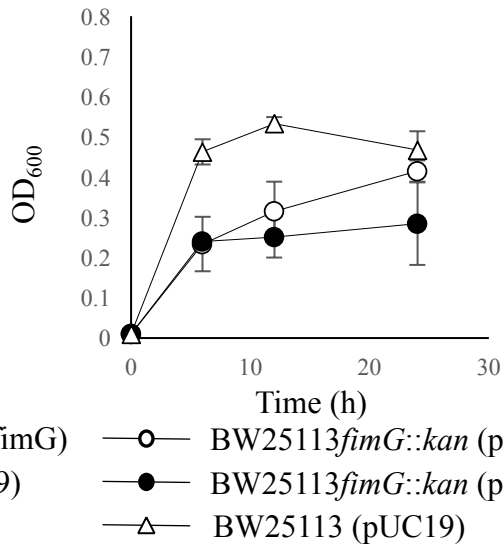

(C)

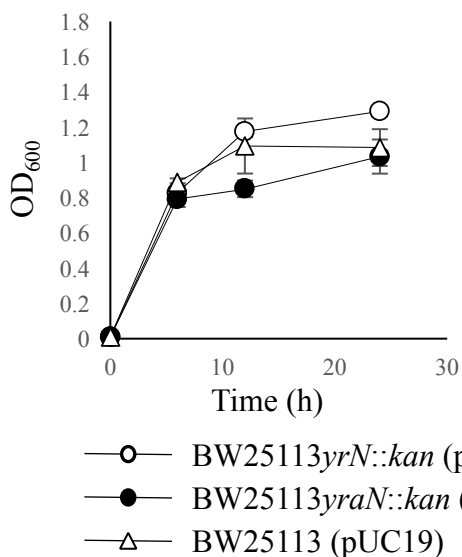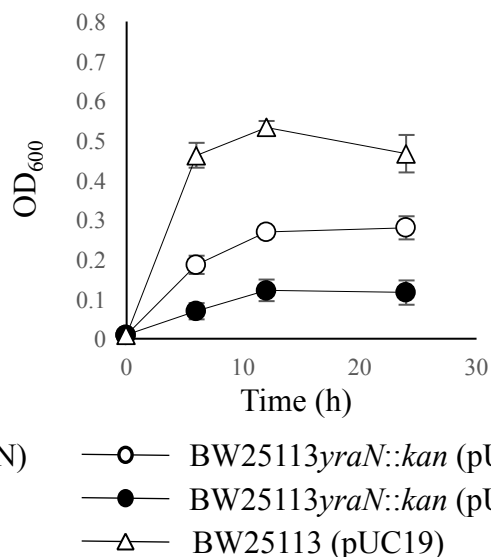

(D)

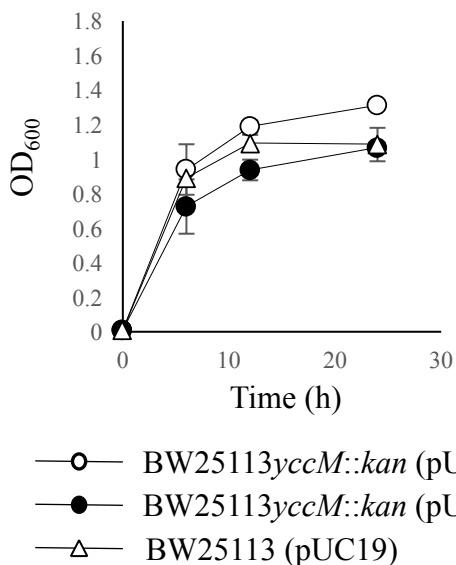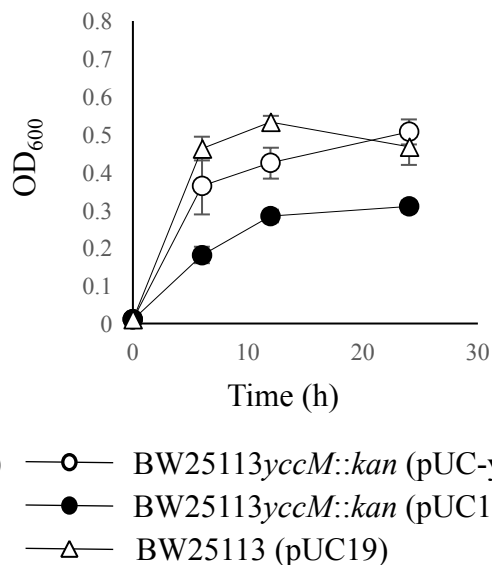

(H)

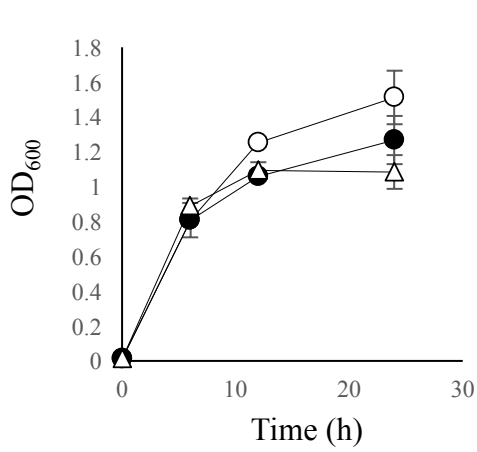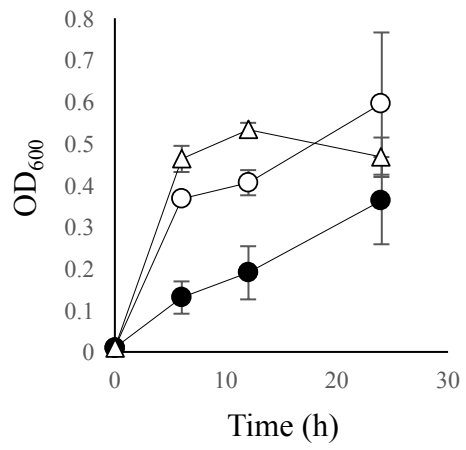

—○— BW25113*cydD*::*kan* (pUC-*cydD*)  
—●— BW25113*cydD*::*kan* (pUC19)  
—△— BW25113 (pUC19)

—○— BW25113*cydD*::*kan* (pUC-*cydD*)  
—●— BW25113*cydD*::*kan* (pUC19)  
—△— BW25113 (pUC19)

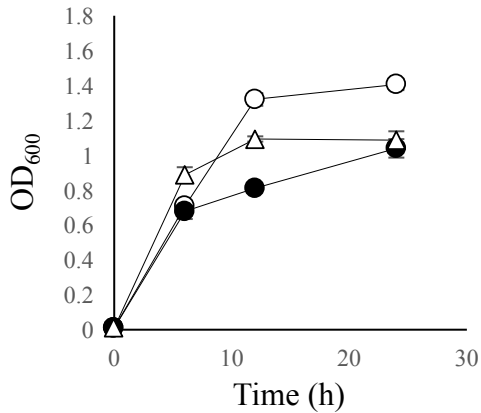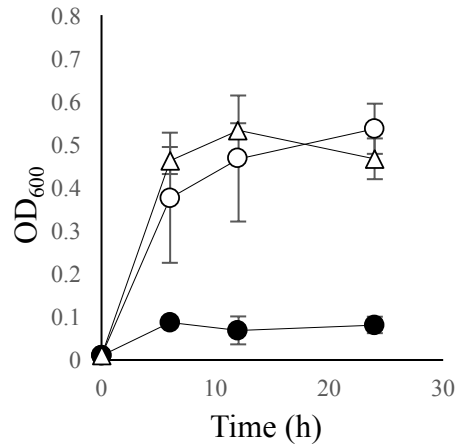

—○— BW25113*nhaA*::*kan* (pUC-*nhaA*)  
—●— BW25113*nhaA*::*kan* (pUC19)  
—△— BW25113 (pUC19)

—○— BW25113*nhaA*::*kan* (pUC-*nhaA*)  
—●— BW25113*nhaA*::*kan* (pUC19)  
—△— BW25113 (pUC19)
